# Supplementary material for: The synergistic effect of acid-etched g-C3N4 nanosheets and polyaniline nanofibers for the adsorption and photocatalytic degradation of textile dyes: a study of charge transfer mechanism and intermediate products
Source: Royal Society of Chemistry journal article supplement (doi:10.1039/d1ma01218e), 2022-01-01
Supplement: d1ma01218e1.pdf [file d1ma01218e1.pdf]

## Electronic Supplementary file

# Synergistic Effect of Acid-Etched g-C<sub>3</sub>N<sub>4</sub> Nanosheets and Polyaniline Nanofibers for the Adsorption and Photocatalytic Degradation of Textile Dyes: Study of Charge Transfer Mechanism and Intermediate Products

Arun Kumar<sup>1</sup>, Honey Mittal<sup>1</sup> Rupali Nagar<sup>2</sup> and Manika Khanuja<sup>1\*</sup>

<sup>1</sup>Centre for Nanoscience and Nanotechnology, Jamia Millia Islamia, New Delhi - 110025,  
India

<sup>2</sup>Nanomaterials for Energy Applications Lab, Applied Science Department, Symbiosis Institute of Technology, Symbiosis International (Deemed University), Lavale, Pune-412115,  
Maharashtra, India

\*Corresponding author [manikakhanuja@gmail.com](mailto:manikakhanuja@gmail.com)

## 1. Experimental

### 1.1 Materials

Melamine (C<sub>3</sub>H<sub>6</sub>N<sub>6</sub>) was purchased from Mumbai, India (Loba Chemie Pvt. Ltd.). Methyl Orange (C<sub>14</sub>H<sub>14</sub>N<sub>3</sub>NaO<sub>3</sub>S), Hydrogen peroxide (H<sub>2</sub>O<sub>2</sub>), Hydrochloric acid (HCl, 99.96%) and Sulphuric acid (H<sub>2</sub>SO<sub>4</sub>) were purchased from Mumbai, India (Thermo Fisher Scientific Pvt. Ltd.). Aniline (C<sub>6</sub>H<sub>5</sub>NH<sub>2</sub>, 99.98%), Congo Red (C<sub>32</sub>H<sub>22</sub>N<sub>6</sub>Na<sub>2</sub>O<sub>6</sub>S<sub>2</sub>) and *tert*-butyl alcohol ((CH<sub>3</sub>)<sub>3</sub>COH) were used from New Delhi, India (Central Drug House(P) Ltd.). Potassium iodide (KI) was purchased from Pallav Chemicals and Solvents Pvt. Ltd., Mumbai, India. Benzoquinone (C<sub>6</sub>H<sub>4</sub>O<sub>2</sub>) was purchased from Molychem Pvt. Ltd., Mumbai, India. Ammonium persulfate ((NH<sub>4</sub>)<sub>2</sub>S<sub>2</sub>O<sub>8</sub>) with 0.0005% (max impurity limits) was purchased from Sisco Research Pvt. Ltd., New Delhi, India.

## 1.2 Synthesis of acid-etched g-C<sub>3</sub>N<sub>4</sub> (TGCN)

The facile synthesis of g-C<sub>3</sub>N<sub>4</sub> (GCN) was performed using thermal condensation method. To synthesize GCN, fine melamine powder ( 5 g) was taken in the crucible and kept the crucible at 550 °C in the muffle furnace for 3 hours at 5 °C /min ramp rate. The obtained yellow material was bulk GCN. For the synthesis of TGCN, 40 ml solution consist of H<sub>2</sub>SO<sub>4</sub> and HNO<sub>3</sub> in 1:1 ratio was prepared and, 2 g of the bulk GCN was added in it. The solution was performed under ultrasonication for 3 hours. The obtained solution was also performed to centrifuge for 10 min at 10,000 rpm and then collected after sequentially washing with acetone and DI water to separate impurity. The final product was dried at 80 °C for 12 hours<sup>1</sup>.

## 1.3 Characterization

Field emission scanning electron microscope (FESEM) was used to observe the surface morphology of the prepared samples using Quanta 3D FEG (FEI's). The structural and crystalline properties of the prepared samples was analyzed with the help of X-ray diffraction (XRD) technique using Rigaku Smart Lab (2θ Range: 5° to 40°). The Fourier transform of infrared (FTIR) spectroscopy and Raman spectra were recorded from Bruker Tensor 37 in between the range of 500-4000 cm<sup>-1</sup>. The study of absorbance spectrum of the prepared photocatalysts were investigated using UV-Vis spectrometer from Agilent technologies, Cary 100 series.

## 1.4 Adsorption and photocatalytic degradation experiment

To evaluate the performance of TGCN and TCP (TCP30, TCP50 and TCP80) nanocomposites, adsorption and photocatalytic degradation of Methyl orange (MO) and Congo red (CR) were studied. The dye removal efficiency and pseudo-first order kinetics were also identified.

$$efficiency (\eta) = \left(1 - \frac{C_t}{C_o}\right) * 100 \quad (S1)$$

$$q_t = \frac{(C_o - C_t)V}{m} \quad (\text{S2})$$

$$\ln(q_e - q_t) = \ln q_e - k_1 t \quad (\text{S3})$$

$$- \ln \left( \frac{C_t}{C_o} \right) = k_2 t \quad (\text{S4})$$

The adsorption and photocatalytic degradation efficiency of MO and CR were evaluated using the Eq. S1, Where  $C_o$  (mg/L) stands for the dye concentration at  $t = 0$ ,  $C_t$  (mg/L) denotes dye concentration at time  $t$ .  $V$  (L) is the volume of the dye solution used in the experiment and  $m$  (mg) is the mass of the synthesized material. The pseudo-first order kinetics of adsorption and photocatalytic degradation of MO and CR using TGCN and TCP nanocomposites were studied using Eq. S2 and S3. Where  $q_e$  (mg/g) and  $q_t$  (mg/g) denotes for the amount adsorbed dye at equilibrium reached and at time  $t$ , respectively,  $k_1$  ( $\text{min}^{-1}$ ) and  $k_2$  ( $\text{min}^{-1}$ ) are the rate constant of pseudo-first order adsorption and photocatalytic degradation process. The ‘k’ values were evaluated using the slopes obtained from the linear fitting as shown in Fig. 2(c) and 2(d).

**Table S1:** Previous reports of g- $\text{C}_3\text{N}_4$  based nanomaterials for the photocatalytic degradation of different dyes

| Material                                            | Synthesis method                                              | Morphology                               | Pollutant | Pollutant removal rate                | References   |
|-----------------------------------------------------|---------------------------------------------------------------|------------------------------------------|-----------|---------------------------------------|--------------|
| TGCN/PANI (TCP50)                                   | In-situ polymerization method                                 | Nanosheets with nanofibers               | MO<br>CR  | 99.3 % in 25 min<br>99.0 % in 150 min | This work    |
| g- $\text{C}_3\text{N}_4/\text{TiO}_2$ @Polyaniline | Lamellar structure of $\text{TiO}_2$ with PANI on the surface | In-situ oxidative polymerization methods | CR        | 100 % in 180 min                      | <sup>2</sup> |

|                                                                          |                                          |                                         |    |                  |    |
|--------------------------------------------------------------------------|------------------------------------------|-----------------------------------------|----|------------------|----|
| g-C <sub>3</sub> N <sub>4</sub>                                          | microrods                                | Chemical method                         | MO | 100 % in 140 min | 3  |
| g-C <sub>3</sub> N <sub>4</sub> /RGO/BFO                                 | Hydrothermal method                      | Porous structure                        | CR | 87.7 % in 60 min | 4  |
| 0.2 wt % Co <sub>3</sub> O <sub>4</sub> -g-C <sub>3</sub> N <sub>4</sub> | Mixing and heating method                | Agglomerated crystal structure          | CR | 100 % in 180 min | 5  |
| PANI/g-C <sub>3</sub> N <sub>4</sub>                                     | In-situ oxidative polymerization         | Aggregated particles                    | MO | 92.8% in 120 min | 6  |
| 7 wt % PANI/BiOCl                                                        | Plate like structure with small particle | Chemisorptions method                   | MO | 67 % in 210 min  | 7  |
| PANI-TiO <sub>2</sub>                                                    | Porous structure                         | Assembly method                         | MO | 98.1% in 6 h     | 8  |
| PANI/MWCNT-APS                                                           | Microemulsion polymerization method      | Fibre-like                              | CR | 91%              | 9  |
| TMC-incorporated Carbon Nitride                                          | Chemical condensation                    | hexagonal and quadrangle honeycomb-like | MO | 60% in 120 min   | 10 |

structure

|            |                                                 |                                        |    |                      |    |
|------------|-------------------------------------------------|----------------------------------------|----|----------------------|----|
| PANI-SWCNT | In situ chemical<br>polymerization<br>technique | Little agglomerated<br>PANI over SWCNT | MO | 94.35 % in 30<br>min | 11 |
|------------|-------------------------------------------------|----------------------------------------|----|----------------------|----|

---

## 2. Results and discussion

The FESEM images of TGCN ( Fig. S1a and S1b ) shows a solid agglomeration of sheet-like morphology to several micrometres, indicated the formation of tri-s-triazine rings<sup>12</sup>. The FESEM images of PANI doped TGCN nanocomposites viz. TCP30, TCP50, and TCP80 are shown in Fig S1(c, e, &g). After the polymerization, nanofibers of PANI were occupied on the surface of TGCN and a combined morphology of both fibrous and layered structure were obtained. TCP nanocomposites (TCP30, TCP50, and TCP80) exhibited lesser diameter and denser interlinked states between TGCN and PANI than pristine TGCN. Fig. S1(d, f, &h) represents the FESEM images of TCP30, TCP50 and TCP80 nanocomposite. The nanofibers of PANI presents on the surface of TGCN formed the synergistic interface between PANI and TGCN. Fig. S2(a) showed the XRD plot of TCP (TCP30, TCP50 and TCP80) nanocomposites. The pristine TGCN can be identified with two clear XRD peaks at  $12.68^\circ$  and  $27.34^\circ$ , which corresponds to (100) and (002) peaks of JCPDS 87-1526. The two characteristic peaks are found in good agreement with the standard reported data<sup>1</sup>. The XRD peak position corresponding to PANI was observed at  $2\theta = 14.4^\circ$ ,  $20.46^\circ$  and  $24.88^\circ$  belongs to the (hkl) planes of (011), (020) and (200), which confirmed the formation of PANI<sup>13, 14</sup>. In the XRD spectra of TCP nanocomposites, a minor peak at  $27.34^\circ$  was ascribed to (002) plane indicated

the presence of TGCN nanosheets. Besides, other XRD peaks of nanofibrous PANI were detected simultaneously, indicating the presence of TGCN nanosheets and PANI nanofibers. The XRD results are also in good agreement with HR-TEM SAED patterns.

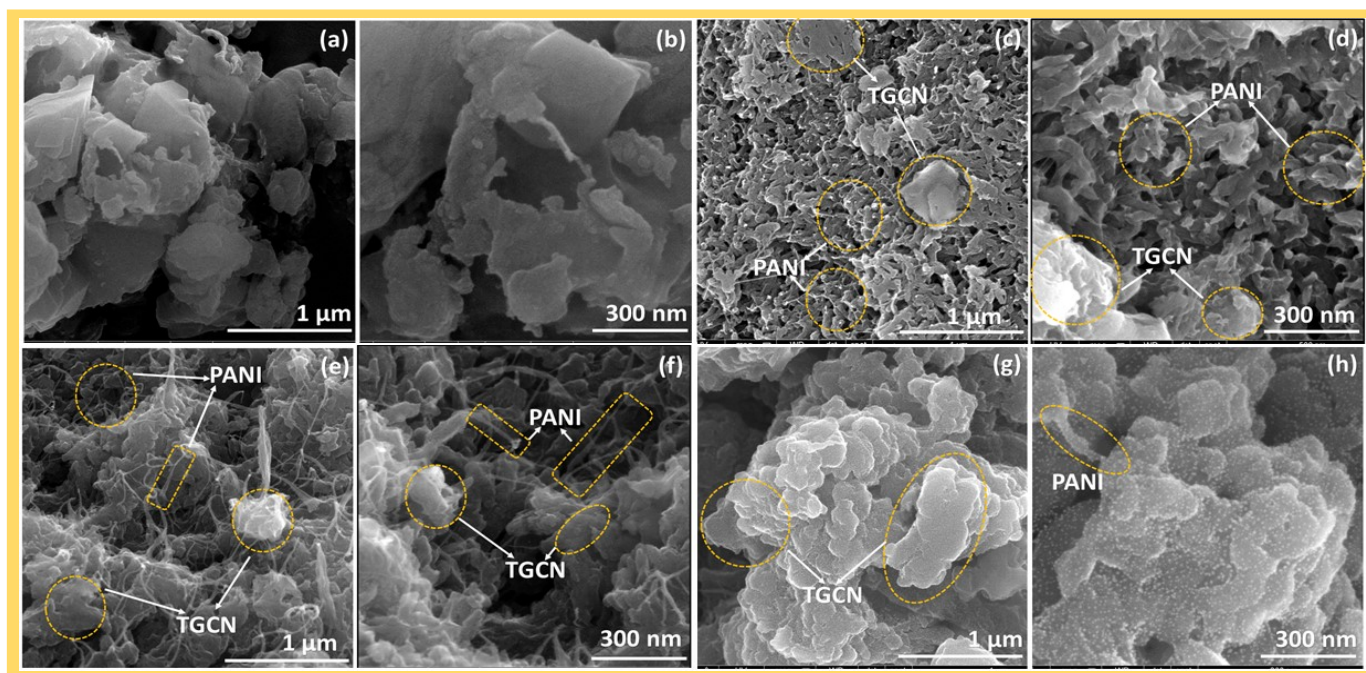

**Fig. S1. FESEM images of (a, b) TGCN (c, d) TCP30 (e, f) TCP50 and (g, h) TCP80.**

The FTIR spectra of TGCN, PANI and TCP nanocomposites are shown in Fig. S2(b). The observed FTIR peaks position appeared at  $795\text{ cm}^{-1}$  (PANI) corresponds to heptazine units, indicating the identification of TGCN. The FTIR bands observed at  $1062$  and  $1556\text{ cm}^{-1}$  represented the OH and CO functional groups which were responsible for the creation of oxygen containing functional groups<sup>12</sup>. The FTIR bands in the region from  $1253$  to  $1409\text{ cm}^{-1}$  and  $1643\text{ cm}^{-1}$  were attributed to the C-N and C=N stretching vibrations<sup>15, 16</sup>. The characteristic FTIR peaks observed at  $1490$  and  $1586\text{ cm}^{-1}$  are due to C=C and C-N stretching vibrations of the benzenoid and quinoid rings, respectively<sup>17</sup>. The FTIR peaks at  $2368$  and  $3743\text{ cm}^{-1}$

appeared due to physically adsorbed CO<sub>2</sub> and H<sub>2</sub>O from the atmosphere<sup>16</sup>. The broad peak at 3040 cm<sup>-1</sup> was assigned to CO<sub>2</sub>, primary and secondary vibrational stretching<sup>1</sup>. The FTIR bands of other nanocomposites (TCP30 and TCP50) was almost in resembles to the pristine TGCN. However, some FTIR peaks were not seen in TCP80. This might be due to the high concentration of TGCN in TCP80 which reduced the effect of PANI. The FTIR results indicated the interaction between the TGCN and PANI had been formed and responsible for the good effect on the stability of the nanocomposite.

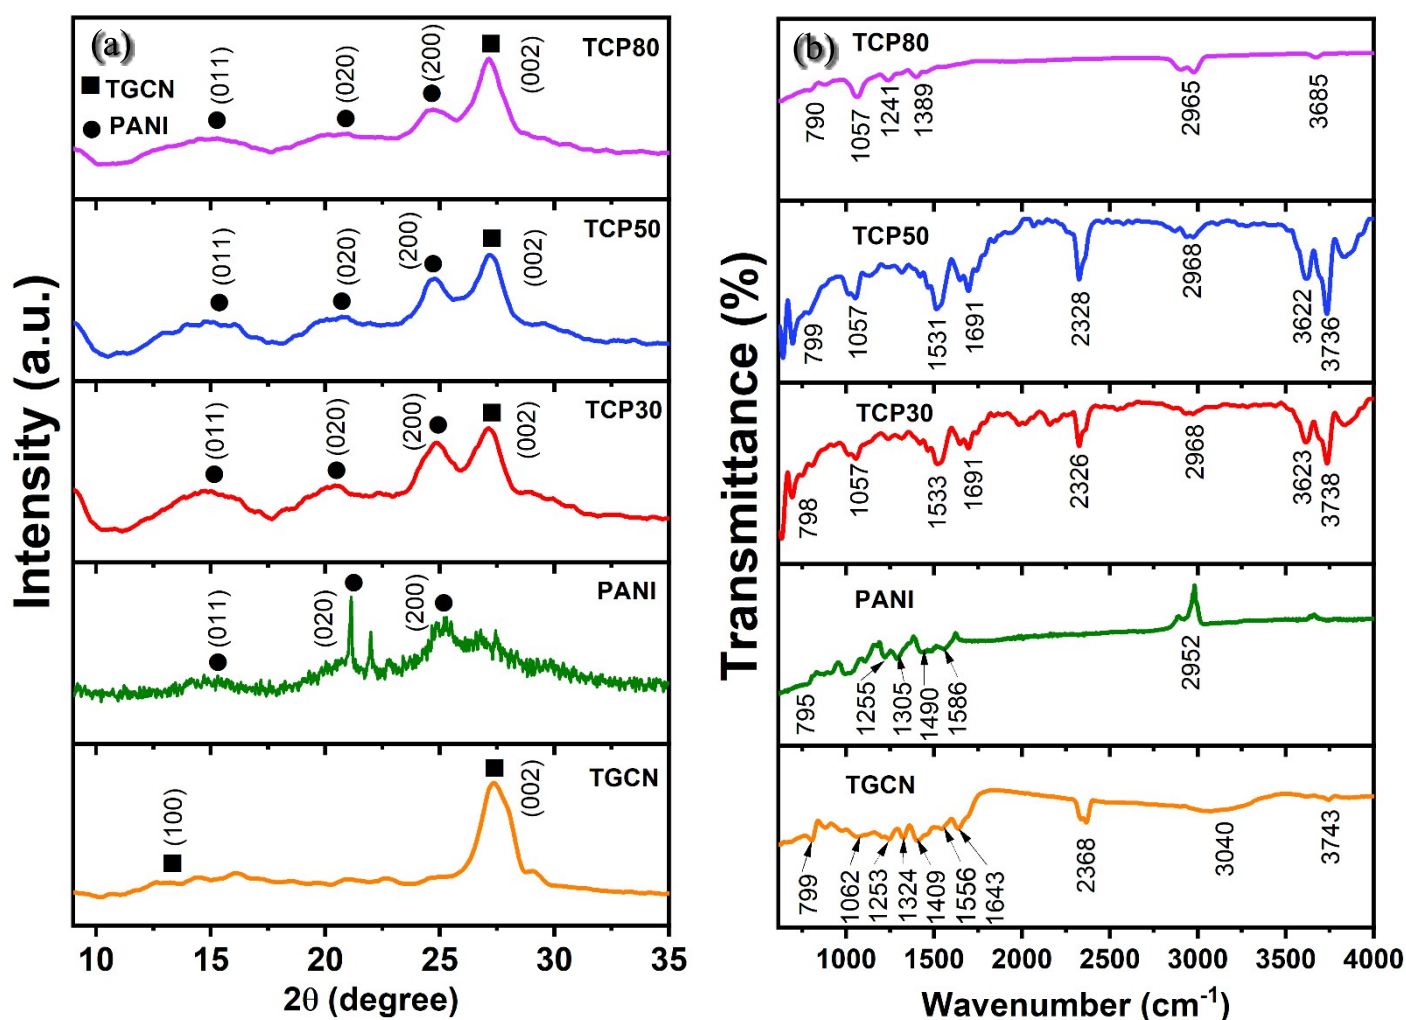

Fig. S2. (a) XRD and (b) FT-IR plots of TGCN, PANI, TCP30, TCP50 and TCP80.

The UV-Vis absorption spectra were used to study optical properties of prepared nanocomposites as shown in Fig. S3 (a-e). TGCN and PANI possessed indirect and direct optical band gaps. The energy band gap of TCP nanocomposites was determined assuming direct optical transitions as PANI was the base material. The bandgap ( $E_g$ ) of all the synthesized samples were calculated from Tauc's plot using Eq. S5. The optical bandgap was calculated using Tauc's plot and results are shown in insets of Fig. S3 (a-e).

$$\alpha h\nu = (h\nu - E_g)^n \quad (S5)$$

where  $h$  is the Planck's constant,  $\alpha$  is the absorption coefficient,  $\nu$  is the frequency,  $E_g$  is the band width of the photocatalyst,  $n$  is the number that determines the transition property which is taken as 0.5 for direct bandgap and 2 for indirect bandgap semiconductor. The calculated optical bandgap of TGCN was found to be 2.65 eV which is suitable for visible light and follows the same with reported literature<sup>1</sup>. However, the optical bandgap of other prepared materials such as PANI, TCP30, TCP50 and TCP80 was found to be 2.72, 2.49, 2.68 and 2.74 eV which follow the higher significant values as TGCN concentration was increased from TCP30 to TCP50. The very close values of optical bandgap in TCP50 and TCP80 describes the stability of the value achieved compared to TCP30. The visible light driven bandgap of TCP nanocomposites makes it a suitable photocatalyst as compared with TGCN.

Fig. S3 (f) presents the Raman spectra for TCP30, TCP50 TCP80 nanocomposites. The absorption band at  $1618\text{ cm}^{-1}$  and  $1189\text{ cm}^{-1}$  describes the C-C bending vibration of benzenoid ring and C-H stretching vibration of semi-quinonoid ring<sup>18</sup>. The band at  $876\text{ cm}^{-1}$ ,  $816\text{ cm}^{-1}$ ,  $507\text{ cm}^{-1}$  and  $419\text{ cm}^{-1}$  are assigned with the in and out planar vibrations of protonated emeraldine rings of PANI<sup>19</sup>. The adsorption band at  $976\text{ cm}^{-1}$  denoted the N-bending parallel modes of triazine units in TCP nanocomposite<sup>20</sup>. In order to study the defects and disorder in TGCN based nanocomposites viz., TCP30, TCP50 and TCP80, intensity ratio of D and G band ( $I_D/I_G$ ) was very useful. The D band ( $1340\text{ cm}^{-1}$ ) was identified with the defect states and G



(1482  $\text{cm}^{-1}$ ) band was associated with graphitic carbon. The evaluated  $I_D/I_G$  ratio of TCP30, TCP50 and TCP80 were 0.98, 0.99 and 0.98, respectively. The Raman spectroscopy confirmed the formation of TCP nanocomposites with more defects on the surface of TCP50 as compared to other nanocomposites.

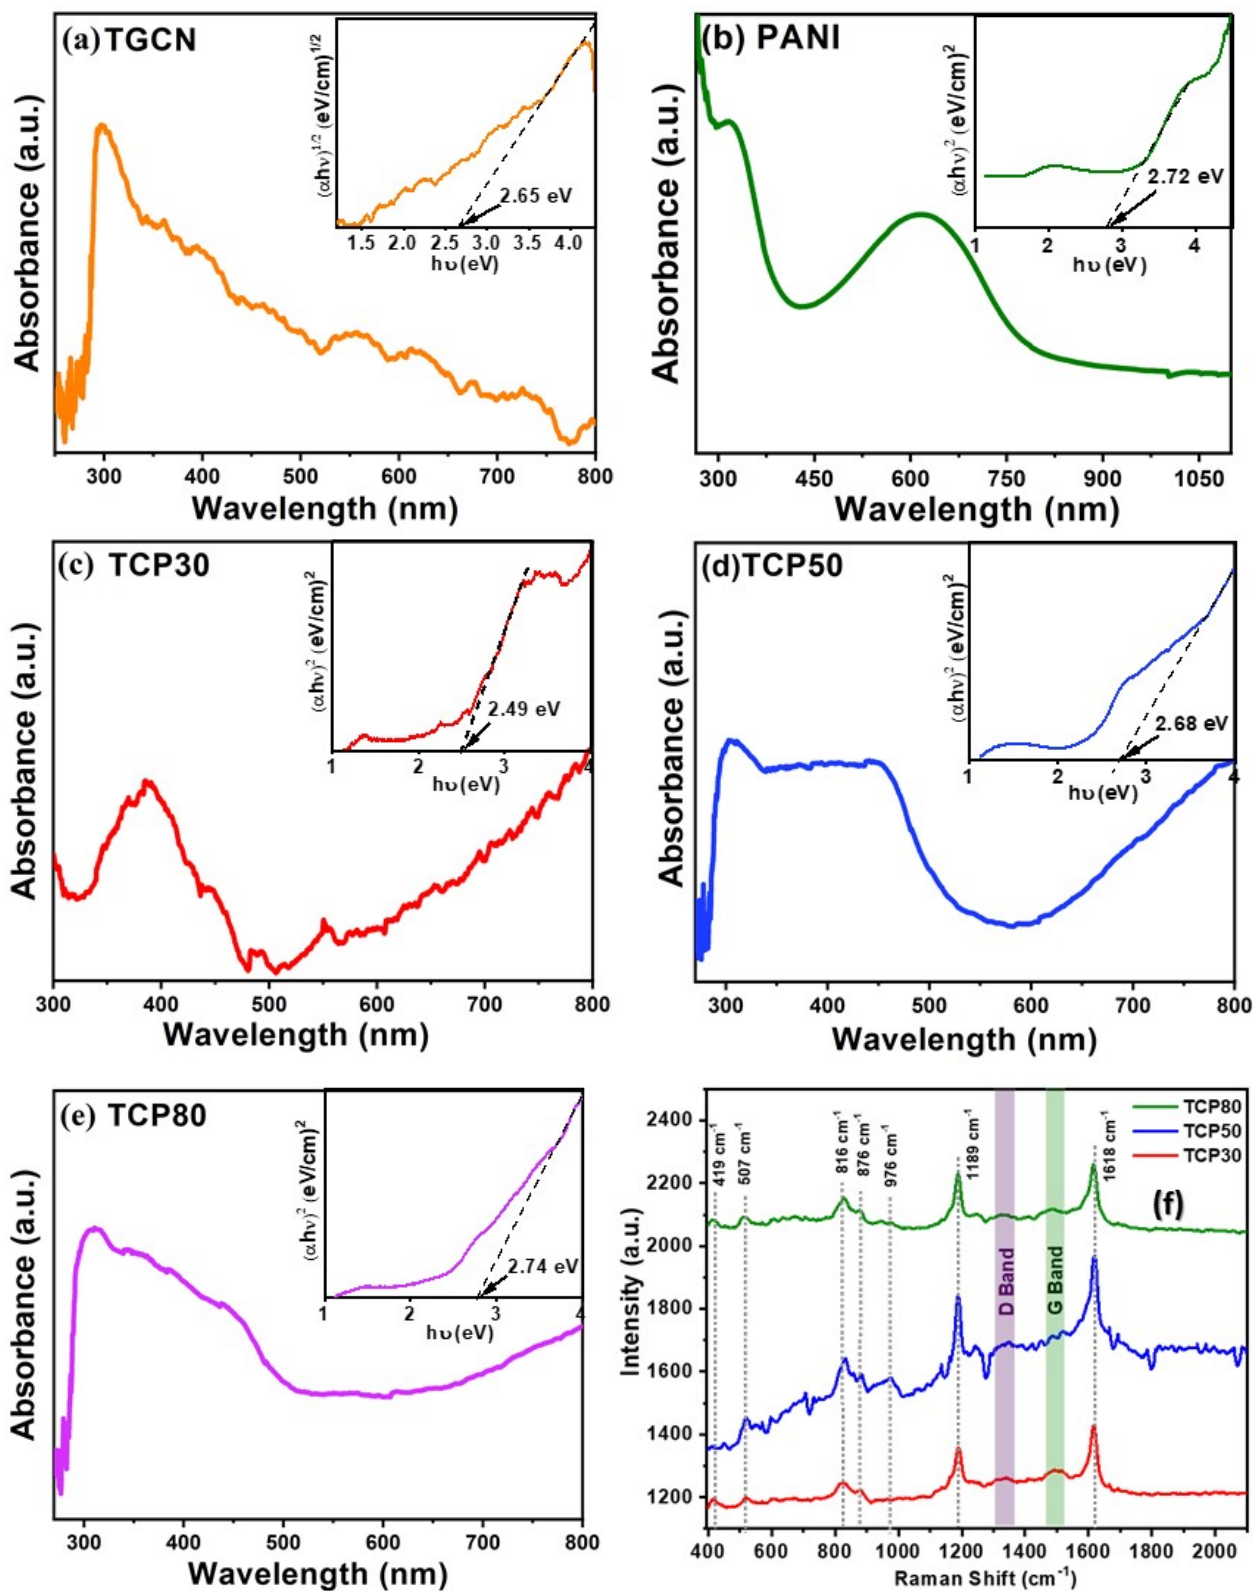

Fig. S3. UV-Vis absorption (inset: Tauc's plot) (a) TGCN, (b) PANI, (c) TCP30, (d) TCP50, (e) TCP80 and (f) Raman spectra of TCP30, TCP50 and TCP80.

Fig. S4 showed the N<sub>2</sub> adsorption-desorption isotherms of the prepared nanomaterials, TGCN, TCP30, TCP50 and TCP80. The obtained BET curves exhibit H3 hysteresis typical with type IV physisorption. The specific surface areas of TGCN, TCP30, TCP50 and TCP80 were found to be 17.05, 36.31, 48.31 and 71.64 m<sup>2</sup> g<sup>-1</sup> respectively. The specific surface areas enhanced from 17.05 to 71.64 m<sup>2</sup> g<sup>-1</sup> with an increase in TGCN/PANI ratio in the synthesized material, as mentioned in Table 1. Pore size distribution plots are shown in Fig. S4 inset through BJH (Barret-Joyner-Halenda) method. The obtained results showed that the increasing TGCN/PANI ratio enhanced the pore volume in TCP50 nanocomposite which enables it to interact with a greater number of dye molecules for the photocatalytic degradation. The result of Brunauer-Emmett-Teller (BET) N<sub>2</sub> adsorption-desorption measurements is consistent with that of TEM (Fig. 3(a)), that is, the introduction of PANI nanofibers over TGCN results in porous structure

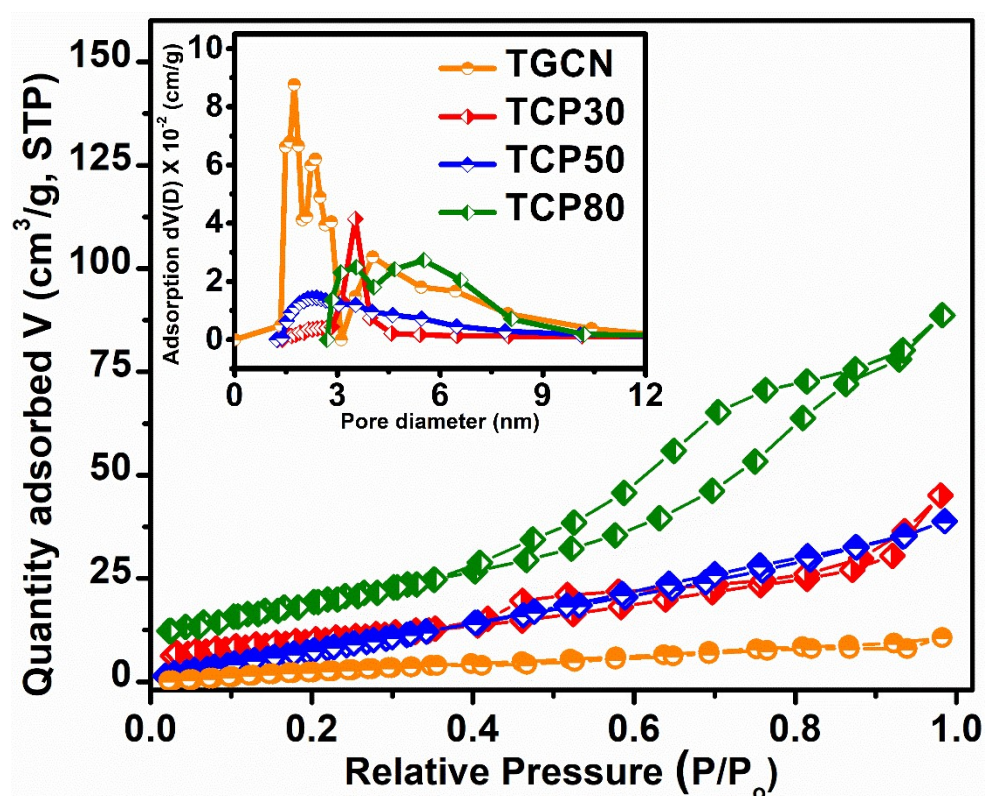

from TGCN to TCP80.

**Fig S4.** The BET N<sub>2</sub> adsorption-desorption curve of TGCN, TCP30, TCP50 and TCP80 with  
(inset) BJH plot of the distribution of pore size

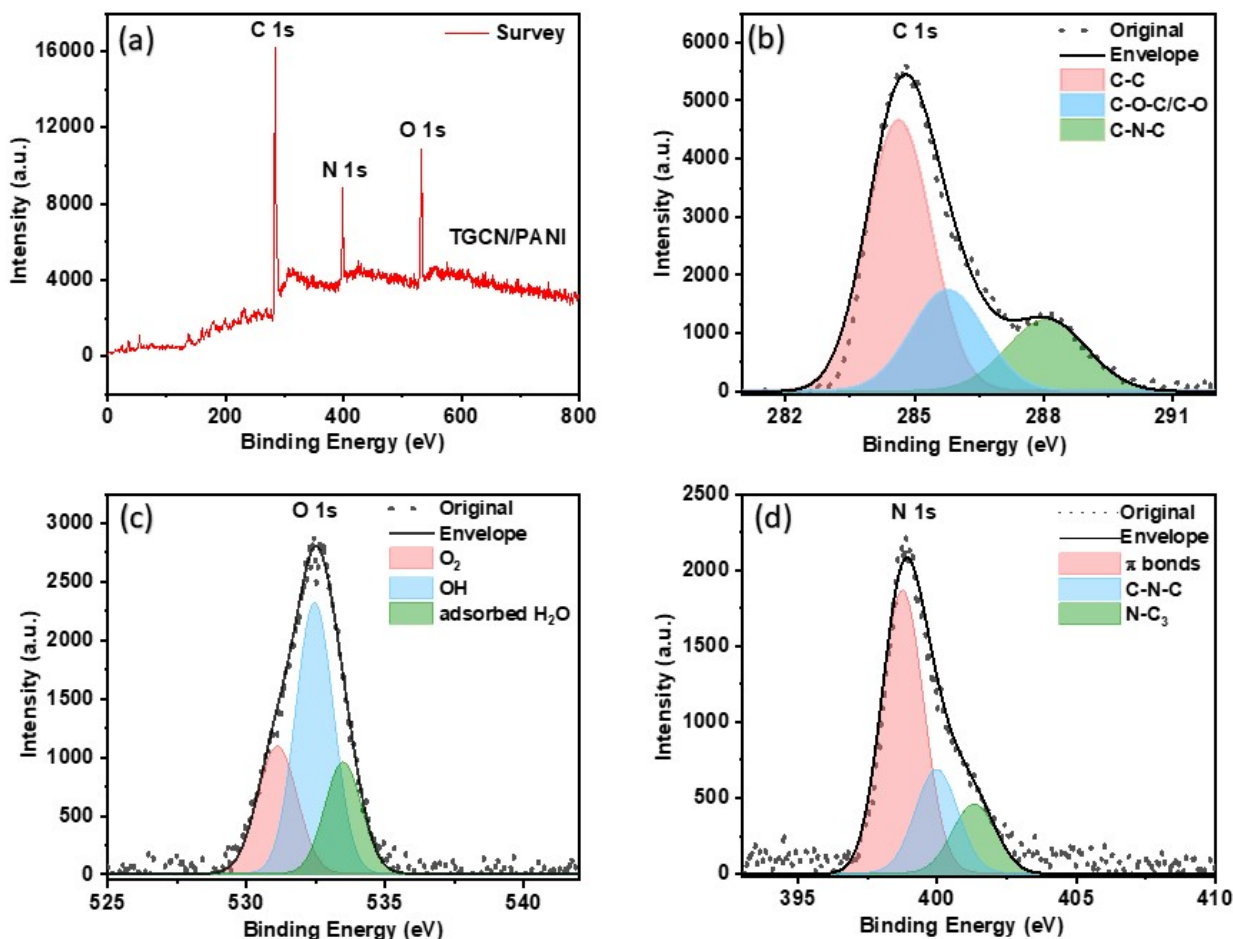

**Fig. S5.** (a) XPS survey spectra, (b) High-resolution C 1s, (c) O 1s, (d) N 1s XPS spectrum of TGCN/PANI (TCP50) nanocomposite.

X-ray photoelectron spectroscopy (XPS) was performed to study the chemical analysis of TGCN/PANI nanocomposite (TCP50). Fig. S5 Shows the general scan, and detailed elemental states of (b) C1s, (c) O1s and (d) N1s of TCP50, respectively. The deconvoluted C 1s spectrum containing three peaks located at 284.6, 286.7 and 288.1 eV, assigned to  $sp^2$  hybridised C=C bond, carbon atoms of PANI or  $g-C_3N_4$  atom linked to the nitrogen atom and the carbon atom that is bonded to nitrogen atoms, respectively<sup>1</sup>. N1s spectra of TCP50 nanocomposite can be

deconvoluted into three peaks located at 398.6, 400 and 401.3 eV, corresponded to  $\pi$  bonds in C=N, N-C<sub>3</sub> and C-N=C, respectively. The fitting of the deconvoluted O 1s spectra gives three peak centred at 531.2, 532.5 and 533.3 confirmed the presence of hydroxyl and carboxylic groups<sup>1</sup>. The slight shift in the peak positions is possibly due to the change in the electronic environment of elements in the TCP50 nanocomposite<sup>20</sup>

## References

1. A. Kumar, S. Singh and M. Khanuja, *Mater. Chem. Phys.*, 2020, **243**, 122402.
2. M. Alenizi, R. Kumar, M. Aslam, F. Alseroury and M. Barakat, *Sci. Rep.*, 2019, **9**, 1-8.
3. I. Aslam, M. H. Farooq, U. Ghani, M. Rizwan, G. Nabi, W. Shahzad and R. Boddula, *Mater. Sci. Technol.*, 2019, **2**, 401-407.
4. M. B. Shekardasht, M. H. Givianrad, P. Gharbani, Z. Mirjafary and A. Mehrizad, *Diam. Relat. Mater.*, 2020, **109**, 108008.
5. C. Han, L. Ge, C. Chen, Y. Li, X. Xiao, Y. Zhang and L. Guo, *Appl. Catal. B.*, 2014, **147**, 546-553.
6. L. Ge, C. Han and J. Liu, *J. Mater. Chem.*, 2012, **22**, 11843-11850.
7. Q. Wang, J. Hui, J. Li, Y. Cai, S. Yin, F. Wang and B. Su, *Appl. Surf. Sci.*, 2013, **283**, 577-583.
8. N. K. Jangid, S. Jadoun, A. Yadav, M. Srivastava and N. Kaur, *Polym. Bull.*, 2021, **78**, 4743-4777.
9. R. S. Aliabadi and N. O. Mahmoodi, *J. Clean. Prod.*, 2018, **179**, 235-245.
10. J. Wang, M. Li, M. Qian, S. Zhou, A. Xue, L. Zhang, Y. Zhao and W. Xing, *Nanoscale Res. Lett.*, 2018, **13**, 248.
11. M. J. Chatterjee, A. Ghosh, A. Mondal and D. Banerjee, *RSC adv.*, 2017, **7**, 36403-36415.
12. R. Kumar, M. Barakat and F. Alseroury, *Sci. Rep.*, 2017, **7**, 1-11.
13. N. Parveen, N. Mahato, M. O. Ansari and M. H. Cho, *Compos. B. Eng.*, 2016, **87**, 281-290.
14. S. H. Patil, A. P. Gaikwad, S. D. Sathaye and K. R. Patil, *Electrochim. Acta*, 2018, **265**, 556-568.
15. K. Pandiselvi, H. Fang, X. Huang, J. Wang, X. Xu and T. Li, *J. Hazard. Mater.*, 2016, **314**, 67-77.
16. C. Cheng, J. Shi, Y. Hu and L. Guo, *Nanotechnology*, 2017, **28**, 164002.
17. L. Zu, X. Cui, Y. Jiang, Z. Hu, H. Lian, Y. Liu, Y. Jin, Y. Li and X. Wang, *Materials*, 2015, **8**, 1369-1383.
18. M. Aymen, S. Sami, S. Ahmed, G. Fethi and B. M. Abdellatif, *J. Phys. D Appl. Phys.*, 2013, **46**, 335103.
19. A. Rohom, P. Londhe and N. Chaure, *Nanosci. Nanotechnol.*, 2016, **6**, 83-87.
20. A. Bahuguna, P. Choudhary, T. Chhabra and V. Krishnan, *ACS omega*, 2018, **3**, 12163-12178.
